# Supplementary material for: Surfactant-assisted synthesis of metallic cadmium, cadmium hydroxide nanostructures and their electrochemical charge storage properties
Source: Royal Society of Chemistry journal article supplement (doi:10.1039/c8dt00638e), 2018-01-01

# **Surfactant-assisted synthesis of metallic cadmium, cadmium hydroxide nanostructures and their electrochemical charge storage properties**

Arjun Moorthy,<sup>a</sup> Mohan Raj Subramaniam,<sup>a,b</sup> Thirugnasambandam G. Manivasagam<sup>a,b</sup> and Duraisamy Kumaresan<sup>\*a,b</sup>

<sup>a</sup> *Department of Chemical Engineering and Materials Science, Amrita School of Engineering, Coimbatore 641112, Amrita Vishwa Vidyapeetham, India*

<sup>b</sup> *Center of Excellence in Advanced Materials and Green Technologies, Amrita School of Engineering, Coimbatore 641112, Amrita Vishwa Vidyapeetham, India*

E-mail: [rdkumares@gmail.com](mailto:rdkumares@gmail.com); [k\\_duraisamy@cb.amrita.edu](mailto:k_duraisamy@cb.amrita.edu)

Fax: +91-422-2656274; Tel: +91-422-2685000

# S1: FESEM images of Cd nanoparticle sheets (Cd NPS)

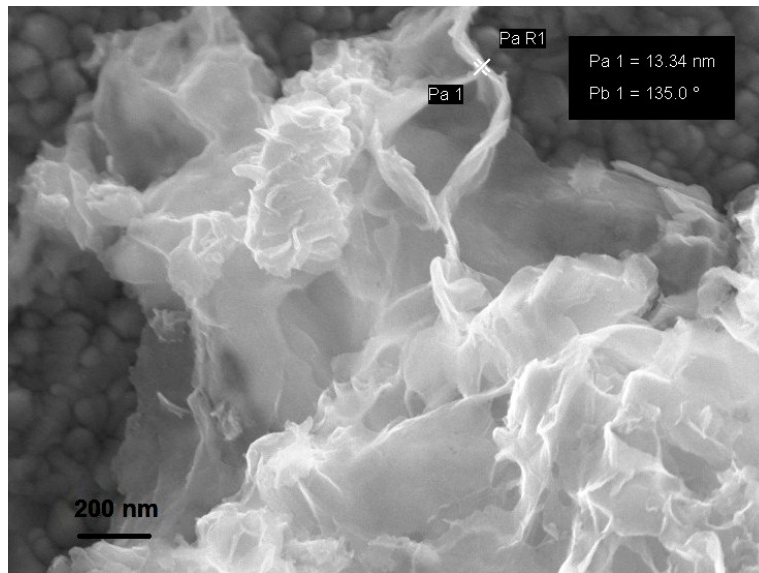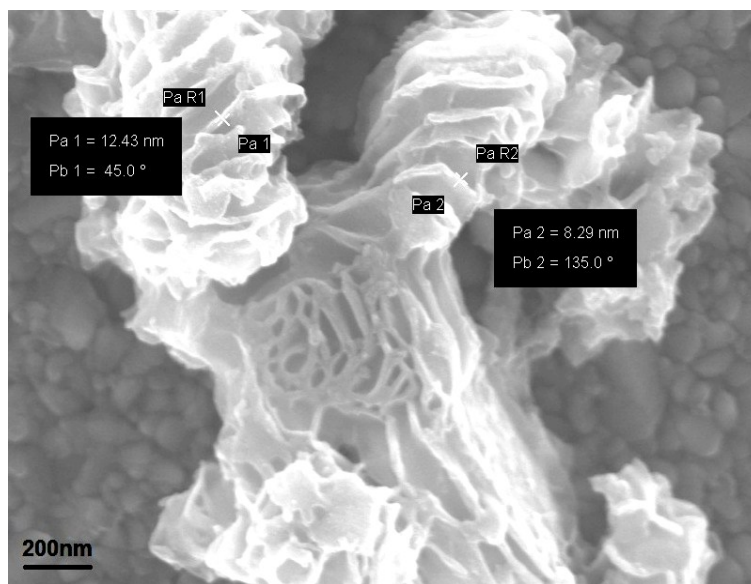

**S2: Growth mechanism of Cd nanoparticle sheets (Cd NPS) from precursors**

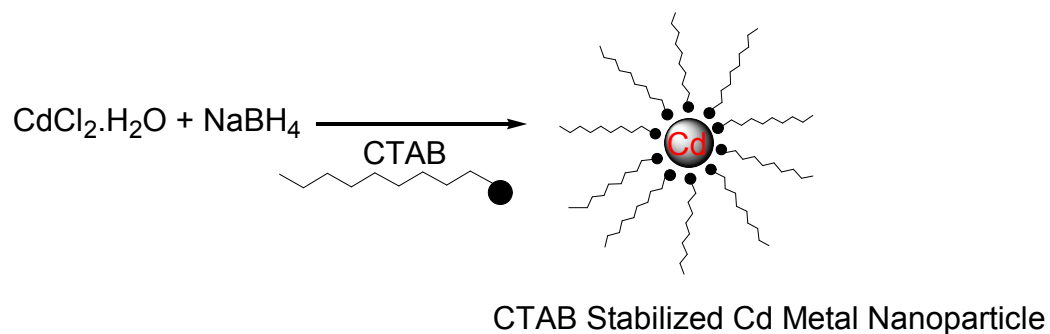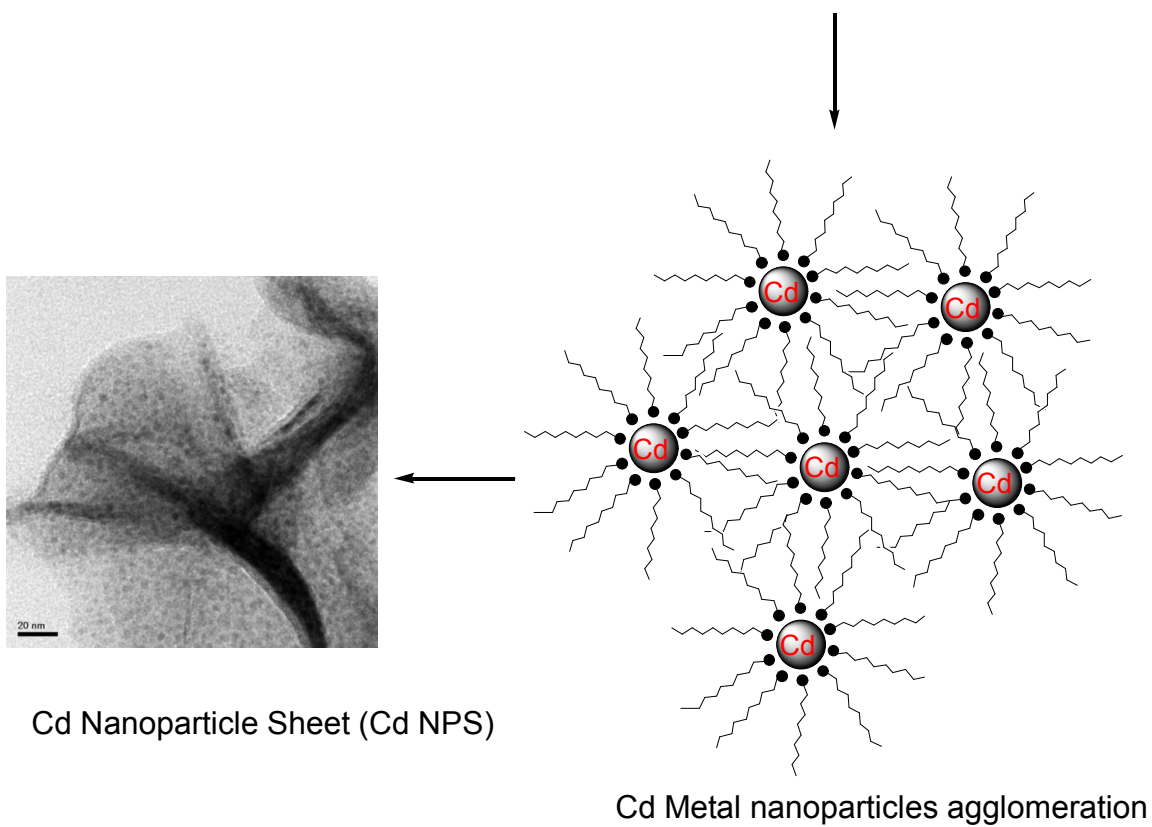

**S3: Cyclic voltammogram of Cd NPS at different scan rates (black circles indicate successive peaks correspond to single-electron capacitive charging of cadmium metal nanoparticles/nanoclusters)**

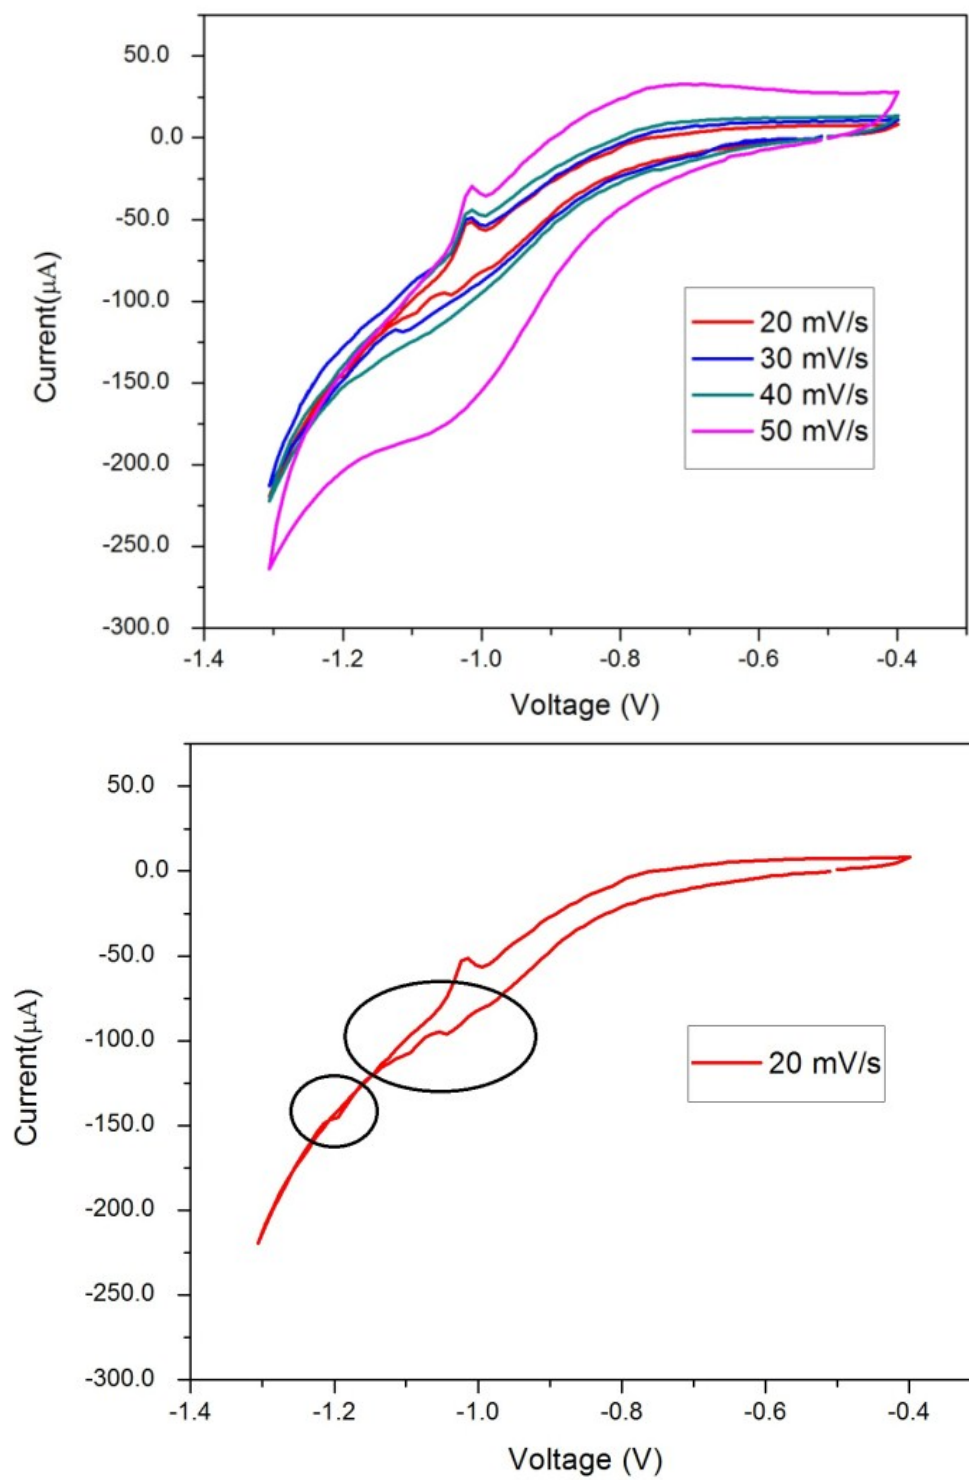

S4: Wide survey XPS spectrum of Cd(OH)<sub>2</sub> NR

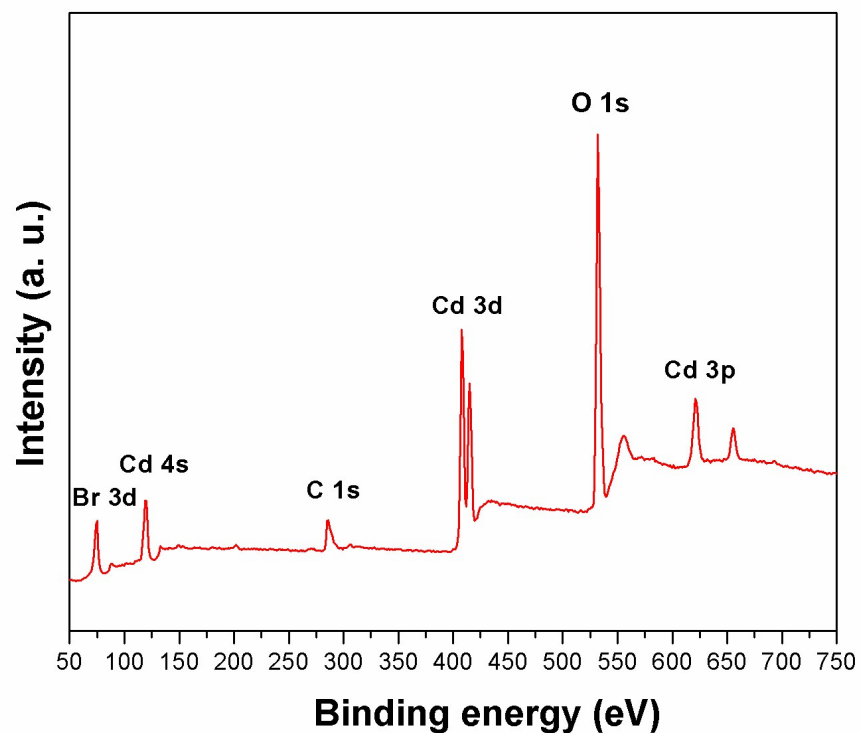

S5: Bar chart comparison of specific capacitance values of Cd NPS, Cd bulk and Cd(OH)<sub>2</sub> NR obtained from cyclic voltammetry curves recorded at 50 mV/s scan rate

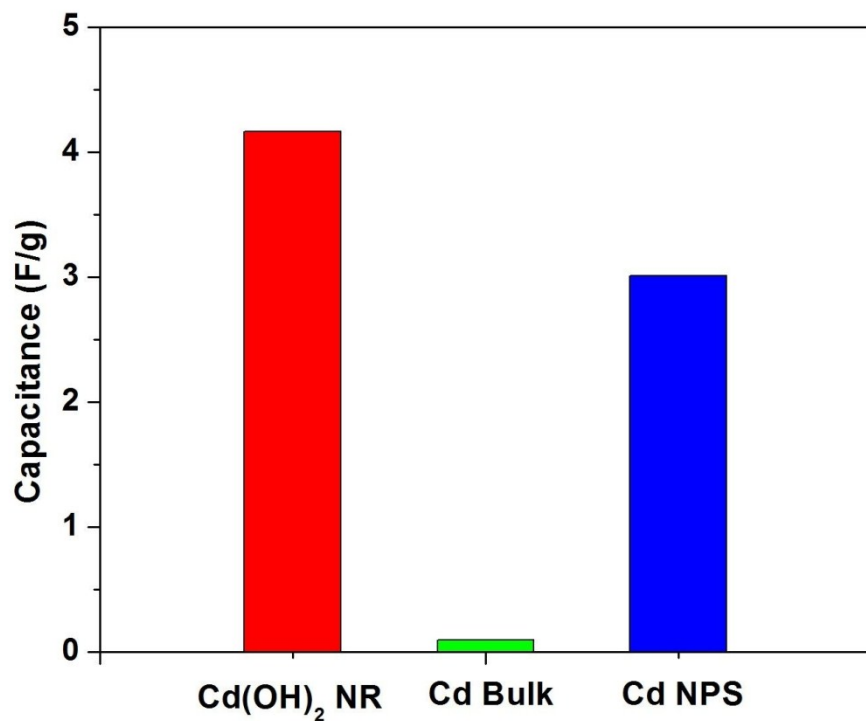

**S6: TGA and DTA curves of the Cd NPS**

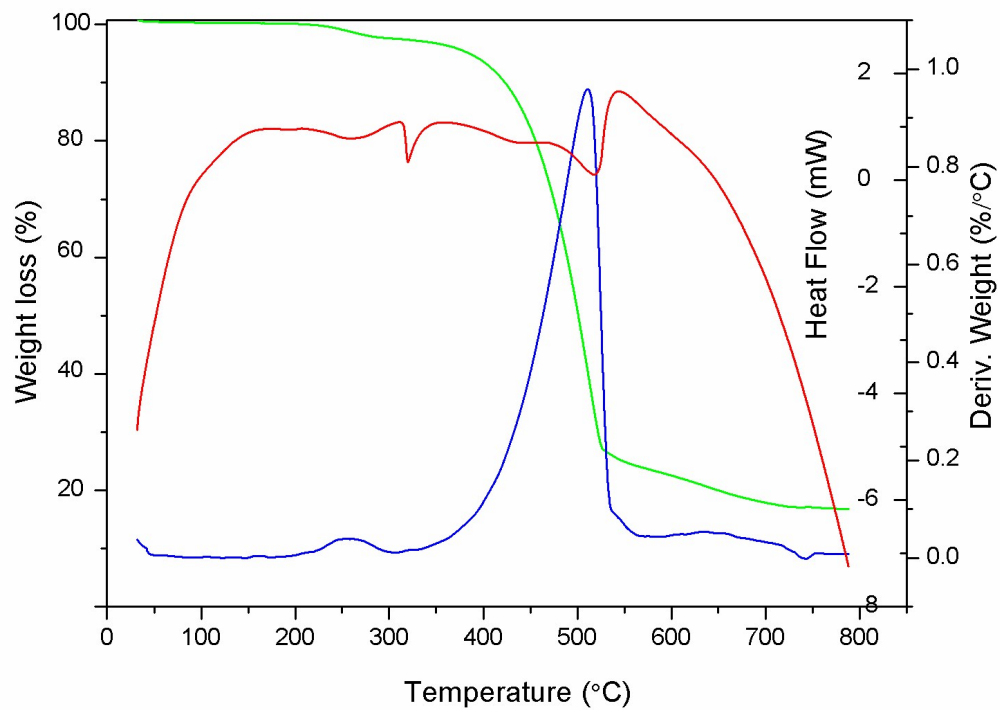

**S7: TGA and DTA curves of the Cd(OH)<sub>2</sub> NR**

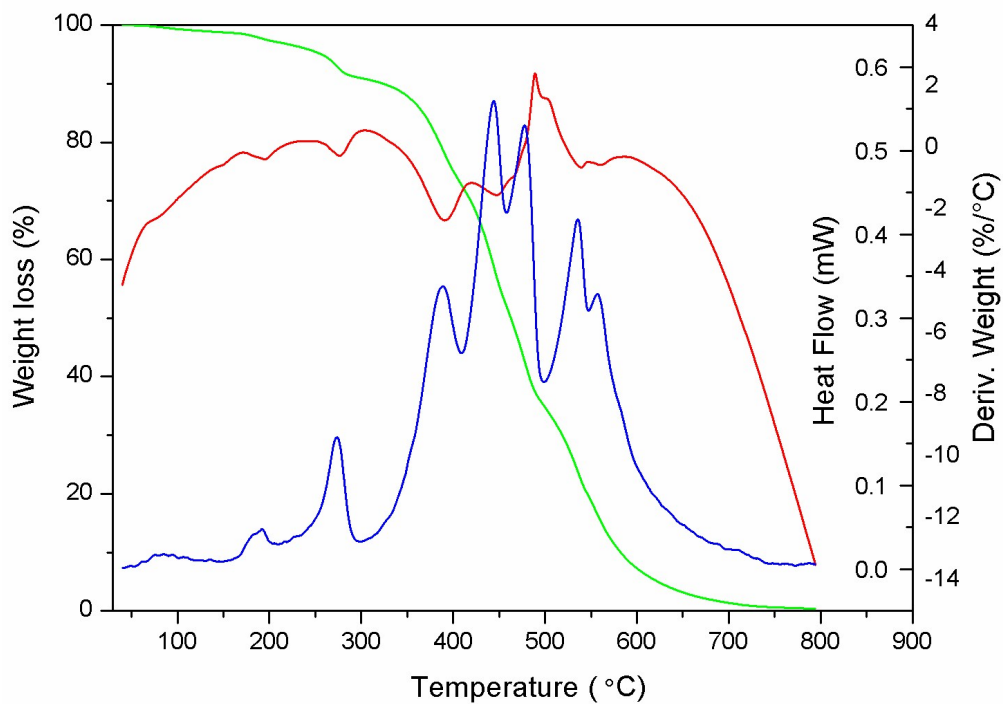

Supplement: c8dt00638e1.pdf [file c8dt00638e1.pdf]
